# Supplementary material
Source: PubMed Central journal article supplement (PMC1478181)
Supplement: 7601106s1.pdf [file 7601106s1.pdf]

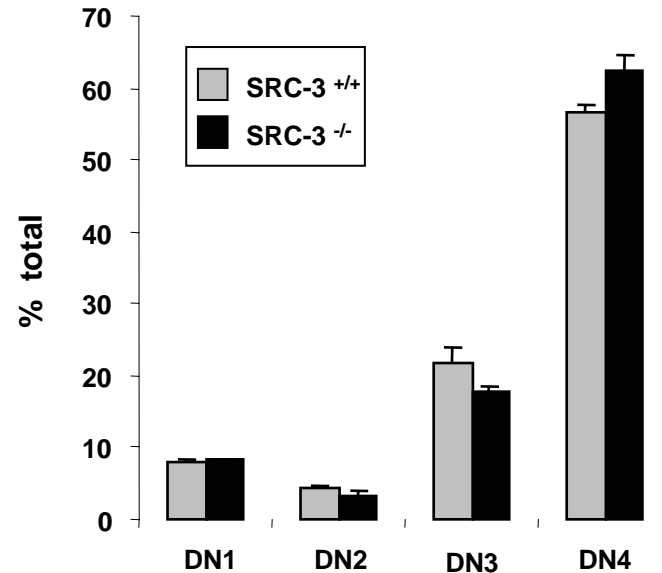

**Figure 1** : Flow cytometry analysis of different subpopulations (DN1-4) of double negative DN cells in the thymus of SRC-3<sup>+/+</sup> ( $n=3$ ) and SRC-3<sup>-/-</sup> ( $n=3$ ) mice.

DN : CD4<sup>-</sup> CD8<sup>-</sup> CD3<sup>-</sup>

DN1 (CD44<sup>+</sup> CD25<sup>-</sup>); DN2 (CD44<sup>+</sup> CD25<sup>+</sup>); DN3 (CD44<sup>-</sup> CD25<sup>+</sup>); DN4 (CD44<sup>-</sup> CD25<sup>-</sup>).
