# Supplementary material
Source: PubMed Central journal article supplement (PMC1478181)
Supplement: 7601106s2.pdf [file 7601106s2.pdf]

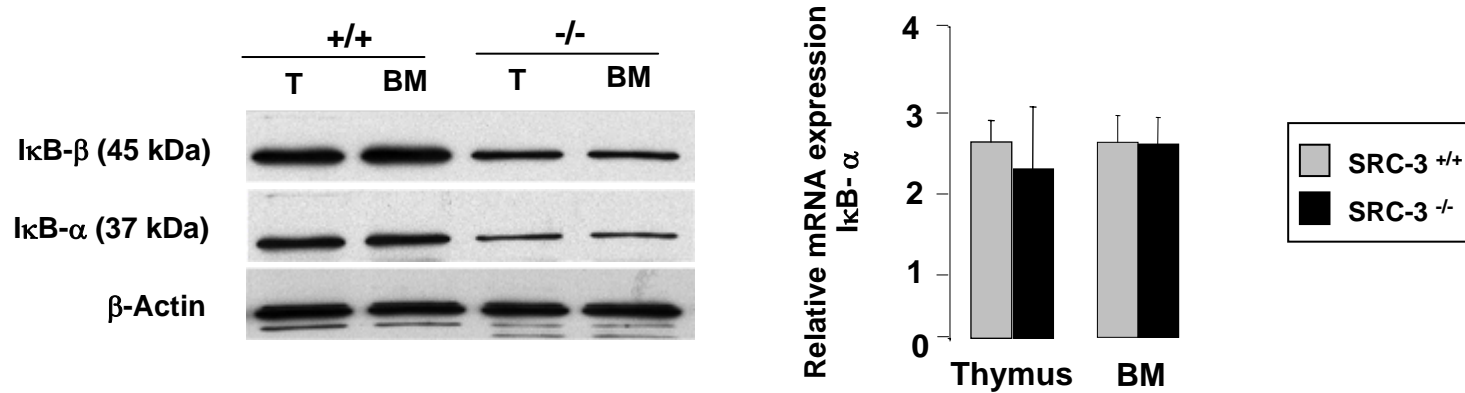

**Figure 2** : Quantification of cytoplasmic IκB-α, IκB-β and β-actin protein expression by immunoblotting (left panel) and mRNA levels of IκB-α (right panel) in thymus and bone marrow by quantitative RT-PCR of SRC-3<sup>+/+</sup> and SRC-3<sup>-/-</sup> mice.
