# Supplementary material
Source: PubMed Central journal article supplement (PMC1478181)
Supplement: 7601106s3.pdf [file 7601106s3.pdf]

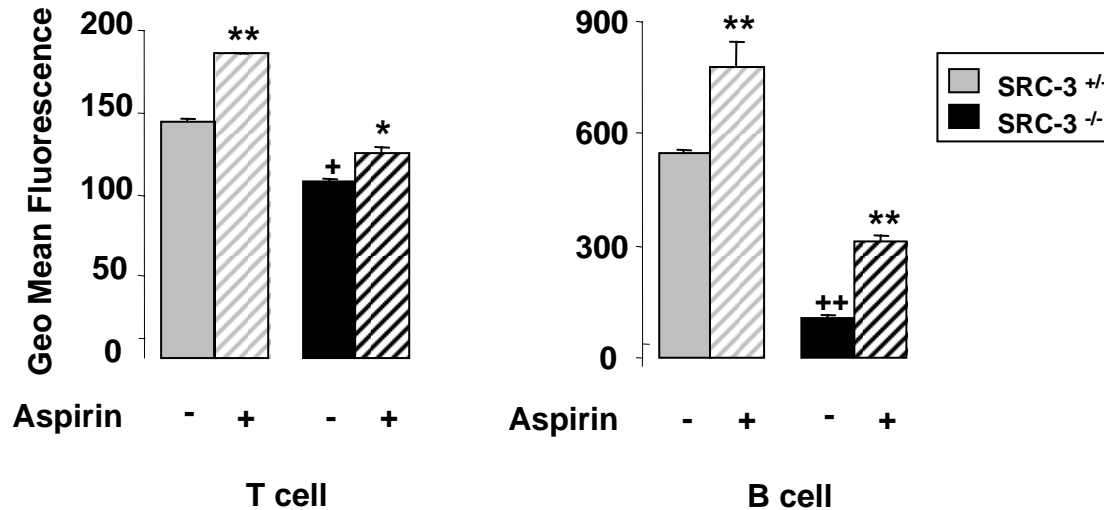

**Figure 3** : T and B cells isolated from SRC-3<sup>+/+</sup> and SRC-3<sup>-/-</sup> spleen mice were stimulated respectively by anti-CD3 + anti-CD28 and anti-IgM + anti-CD40 in the presence or absence of aspirin. The geometric mean fluorescence is inversely proportional to proliferation rate. +(p<0.05), ++(p<0.01) indicates a significant difference compared with SRC-3<sup>+/+</sup> cells. \*(p<0.05), \*\*(p<0.01) indicates a significant difference relative to the condition without aspirin.
